# Supplementary material
Source: PubMed Central journal article supplement (PMC1885496)

isotype (Rat IgG2a)

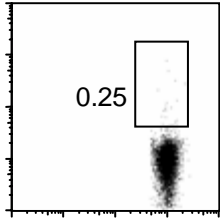

Foxp3

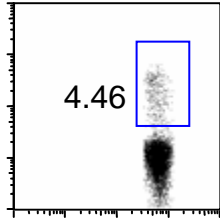

Supplement: blood_blood-2006-11-055756_1.pdf [file blood_blood-2006-11-055756_1.pdf]

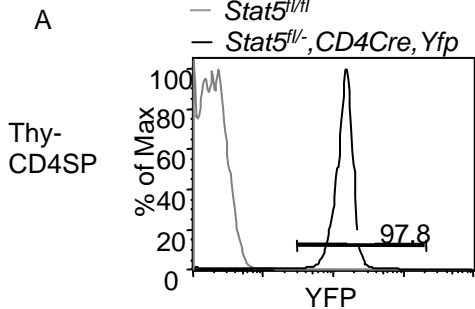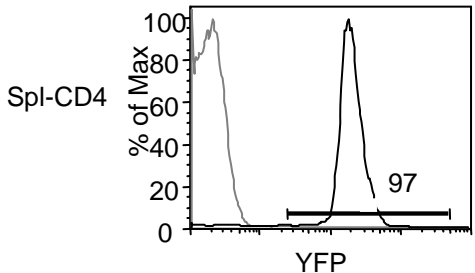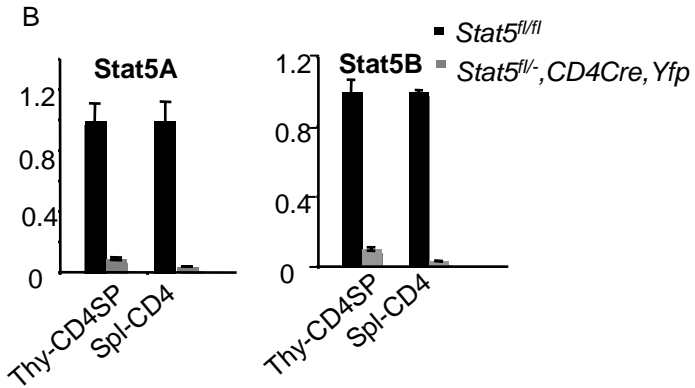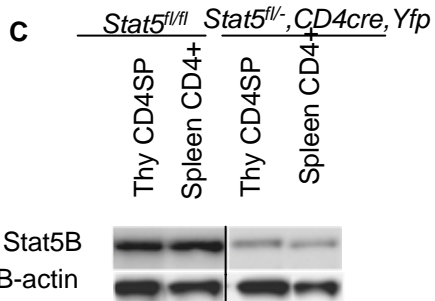

Supplement: blood_blood-2006-11-055756_2.pdf [file blood_blood-2006-11-055756_2.pdf]

heart

liver

Lung

stomach

Stat5<sup>fl/fl</sup>

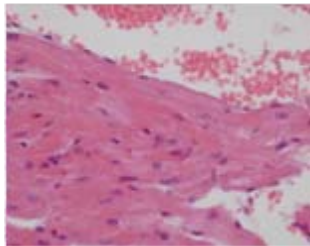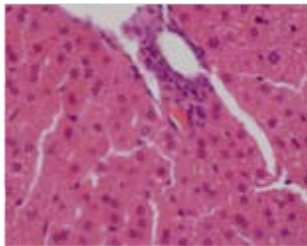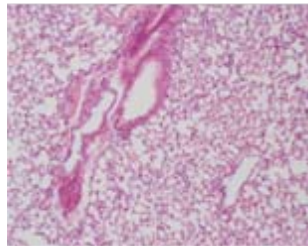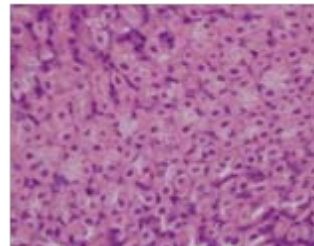

Stat5<sup>fl/-</sup>, CD4cre

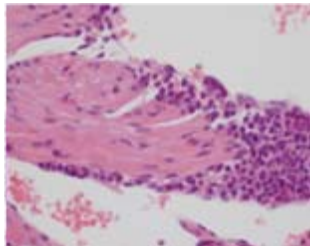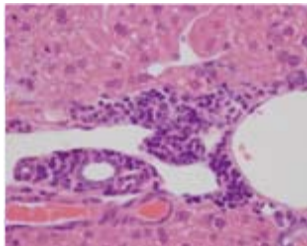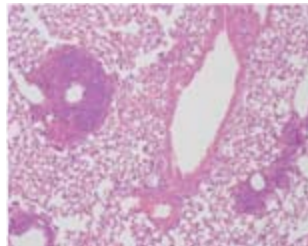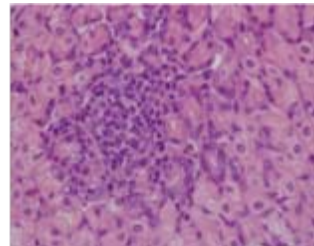

Supplement: blood_blood-2006-11-055756_3.pdf [file blood_blood-2006-11-055756_3.pdf]

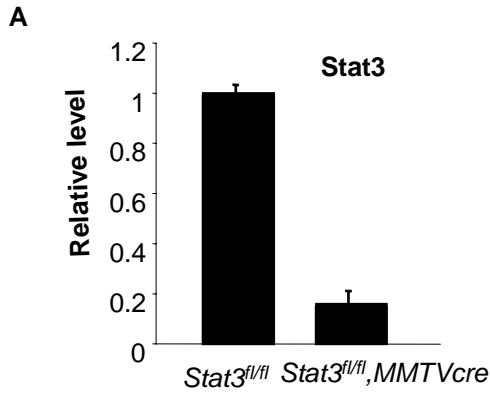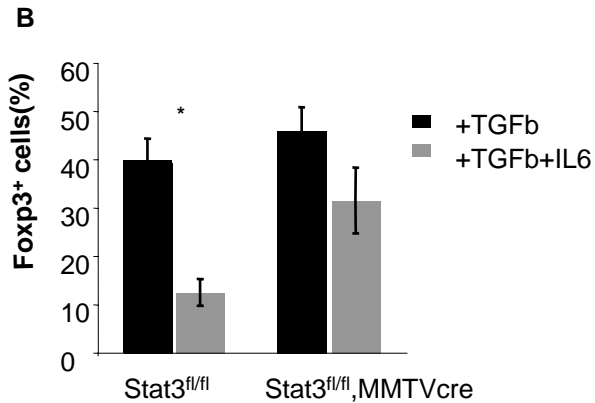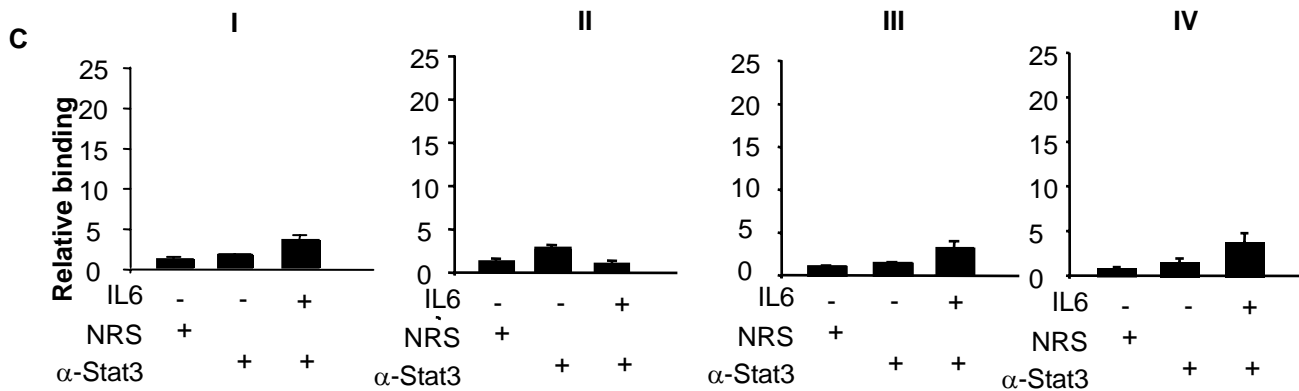

Supplement: blood_blood-2006-11-055756_4.pdf [file blood_blood-2006-11-055756_4.pdf]
